# Supplementary material for: Pan-Cancer Prognostic Role and Targeting Potential of the Estrogen-Progesterone Axis
Source: Front Oncol. 2021 Jul 12;11:636365. doi: 10.3389/fonc.2021.636365 (PMC8311599; doi:10.3389/fonc.2021.636365)
Supplement: Supplementary file 3 [file Table_2.xlsx]

## Sheet: Sheet1
ID	Name	Drug Type	Targets	#Targets
DB06937	4-(6-HYDROXY-BENZO[D]ISOXAZOL-3-YL)BENZENE-1,3-DIOL	Small Molecule	ESR2	1
DB07032	2-(4-HYDROXY-PHENYL)BENZOFURAN-5-OL	Small Molecule	ESR2	1
DB05052	MF101	Small Molecule	ESR2	1
DB07757	(9aS)-4-bromo-9a-butyl-7-hydroxy-1,2,9,9a-tetrahydro-3H-fluoren-3-one	Small Molecule	ESR2	1
DB03860	N-Butyl-11-[(7r,8r,9s,13s,14s,17s)-3,17-Dihydroxy-13-Methyl-7,8,9,11,12,13,14,15,16,17-Decahydro-6h-Cyclopenta[a]Phenanthren-7-Yl]-N-Methylundecanamide	Small Molecule	ESR2	1
DB03882	5-Alpha-Androstane-3-Beta,17beta-Diol	Small Molecule	ESR2	1
DB04020	4-(2-{[4-{[3-(4-Chlorophenyl)Propyl]Sulfanyl}-6-(1-Piperazinyl)-1,3,5-Triazin-2-Yl]Amino}Ethyl)Phenol	Small Molecule	ESR2	1
DB07036	(3aS,4R,9bR)-2,2-difluoro-4-(4-hydroxyphenyl)-6-(methoxymethyl)-1,2,3,3a,4,9b-hexahydrocyclopenta[c]chromen-8-ol	Small Molecule	ESR2	1
DB08020	(3AS,4R,9BR)-4-(4-HYDROXYPHENYL)-6-(METHOXYMETHYL)-1,2,3,3A,4,9B-HEXAHYDROCYCLOPENTA[C]CHROMEN-8-OL	Small Molecule	ESR1, ESR2	2
DB05882	CHF 4227	Small Molecule	ESR1, ESR2	2
DB07933	Erteberel	Small Molecule	ESR1, ESR2	2
DB06249	Arzoxifene	Small Molecule	ESR1, ESR2	2
DB13869	2-Methoxy-6-{(E)-[(4-methylphenyl)imino]methyl}phenol	Small Molecule	ESR1, ESR2	2
DB09535	Octocrylene	Small Molecule	ESR1, ESR2	2
DB06401	Bazedoxifene	Small Molecule	ESR1, ESR2	2
DB01878	Benzophenone	Small Molecule	ESR1, ESR2	2
DB04574	Estrone sulfate	Small Molecule	ESR1, ESR2	2
DB05966	TAS-108	Small Molecule	ESR1, ESR2	2
DB07638	(3AS,4R,9BR)-2,2-DIFLUORO-4-(4-HYDROXYPHENYL)-1,2,3,3A,4,9B-HEXAHYDROCYCLOPENTA[C]CHROMEN-8-OL	Small Molecule	ESR1, ESR2	2
